# Supplementary material for: Identification of Carbohydrate Metabolism Genes in the Metagenome of a Marine Biofilm Community Shown to Be Dominated by Gammaproteobacteria, Bacteroidetes
Source: PubMed Central journal article supplement (PMC3966224; doi:10.3390/genes1030371), 2010-10-26
Supplement: genes-01-00371-s001.pdf [file genes-01-00371-s001.pdf]

**Supplementary Table 1.** Summary of similarities found in the Irish Sea metagenome to Glycoside Hydrolases present in a database constructed from twelve Pfam families.

| Assembled contig ID | UniProt Accession number | % identity | alignment length | mismatches | gap openings | q. start | q. end | s. start | s. end | e-value   | bit score |
|---------------------|--------------------------|------------|------------------|------------|--------------|----------|--------|----------|--------|-----------|-----------|
| contig06721         | Q11NQ3_CYTH3             | 75.29      | 170              | 42         | 0            | 684      | 175    | 56       | 225    | 2.00E-116 | 335       |
| contig02397         | Q11UC0_CYTH3             | 65.79      | 190              | 65         | 0            | 291      | 860    | 97       | 286    | 1.00E-100 | 318       |
| contig05603         | Q21NA7_SACD2             | 54.24      | 177              | 81         | 0            | 2        | 532    | 86       | 262    | 2.00E-95  | 265       |
| contig26022         | A7LS44_BACOV             | 54.14      | 133              | 61         | 0            | 455      | 853    | 778      | 910    | 2.00E-79  | 181       |
| contig04690         | Q11NQ3_CYTH3             | 76.98      | 126              | 29         | 0            | 73       | 450    | 33       | 158    | 2.00E-67  | 251       |
| contig05277         | Q11VQ4_CYTH3             | 50.26      | 193              | 96         | 0            | 2        | 580    | 938      | 1130   | 1.00E-64  | 243       |
| contig03455         | Q11PI8_CYTH3             | 41.06      | 263              | 155        | 0            | 113      | 901    | 1050     | 1312   | 1.00E-62  | 187       |
| contig26107         | Q11VQ4_CYTH3             | 68.06      | 144              | 46         | 0            | 443      | 12     | 673      | 816    | 2.00E-62  | 234       |
| contig04179         | A3HX16_9SPHI             | 55.56      | 153              | 68         | 0            | 4        | 462    | 105      | 257    | 2.00E-62  | 235       |
| contig07415         | Q11NQ3_CYTH3             | 77.14      | 70               | 16         | 0            | 599      | 390    | 236      | 305    | 1.00E-60  | 126       |
| contig02925         | Q11UC0_CYTH3             | 80.77      | 104              | 20         | 0            | 2        | 313    | 443      | 546    | 3.00E-60  | 227       |
| contig01407         | A6EHL7_9SPHI             | 49.39      | 164              | 83         | 0            | 1376     | 885    | 282      | 445    | 1.00E-58  | 224       |
| contig04013         | Q11PI8_CYTH3             | 68.75      | 112              | 35         | 0            | 337      | 2      | 340      | 451    | 2.00E-55  | 211       |
| contig02917         | Q308B9_9BACT             | 68.07      | 119              | 38         | 0            | 31       | 387    | 223      | 341    | 1.00E-54  | 209       |
| contig12578         | A7V9B3_BACUN             | 77.19      | 57               | 13         | 0            | 217      | 47     | 777      | 833    | 2.00E-53  | 118       |
| contig05485         | Q308B7_9BACT             | 70.73      | 82               | 24         | 0            | 502      | 257    | 227      | 308    | 1.00E-51  | 115       |
| contig25936         | B1ZP97_OPITP             | 56.67      | 60               | 26         | 0            | 387      | 208    | 131      | 190    | 2.00E-50  | 91.8      |
| contig00226         | Q11PI9_CYTH3             | 62.65      | 83               | 31         | 0            | 366      | 118    | 139      | 221    | 1.00E-49  | 95.9      |
| contig04413         | Q21NA7_SACD2             | 64.76      | 105              | 37         | 0            | 389      | 75     | 556      | 660    | 6.00E-47  | 184       |
| contig26301         | Q11PI9_CYTH3             | 57.8       | 109              | 46         | 0            | 339      | 13     | 839      | 947    | 2.00E-45  | 178       |
| contig25564         | Q11VQ4_CYTH3             | 51.16      | 129              | 63         | 0            | 395      | 9      | 902      | 1030   | 3.00E-44  | 174       |
| contig08782         | Q11PI8_CYTH3             | 72.04      | 93               | 26         | 0            | 285      | 7      | 467      | 559    | 3.00E-42  | 167       |

Supplementary Table 1. *Cont.*

| Assembled contig ID | UniProt Accession number | % identity | alignment length | mismatches | gap openings | q. start | q. end | s. start | s. end | e-value  | bit score |
|---------------------|--------------------------|------------|------------------|------------|--------------|----------|--------|----------|--------|----------|-----------|
| contig05185         | Q9REW0_ERWCH             | 60.34      | 58               | 23         | 0            | 200      | 373    | 184      | 241    | 5.00E-42 | 95.5      |
| contig05113         | B3PD52_CELJU             | 51.72      | 116              | 56         | 0            | 83       | 430    | 325      | 440    | 7.00E-41 | 163       |
| contig04687         | C5BPZ6_9GAMM             | 68.18      | 88               | 28         | 0            | 3        | 266    | 82       | 169    | 6.00E-40 | 159       |
| contig15223         | Q11PI8_CYTH3             | 67.44      | 86               | 28         | 0            | 15       | 272    | 616      | 701    | 2.00E-39 | 157       |
| contig04664         | Q023N8_SOLUE             | 51.72      | 87               | 42         | 0            | 262      | 2      | 467      | 553    | 5.00E-37 | 126       |
| contig08470         | Q11VF9_CYTH3             | 68.18      | 66               | 21         | 0            | 801      | 998    | 54       | 119    | 6.00E-37 | 126       |
| contig17088         | Q06B38_9BACT             | 60.22      | 93               | 37         | 0            | 3        | 281    | 324      | 416    | 1.00E-36 | 149       |
| contig01678         | Q21HS9_SACD2             | 53.92      | 102              | 47         | 0            | 308      | 3      | 412      | 513    | 1.00E-36 | 149       |
| contig18893         | Q47XT7_COLP3             | 72.15      | 79               | 22         | 0            | 239      | 3      | 227      | 305    | 7.00E-36 | 145       |
| contig08844         | A4CKZ7_9FLAO             | 69.74      | 76               | 23         | 0            | 236      | 9      | 166      | 241    | 1.00E-34 | 141       |
| contig24355         | Q21GC6_SACD2             | 67.5       | 80               | 26         | 0            | 240      | 1      | 53       | 132    | 2.00E-34 | 141       |
| contig14077         | B3PEQ9_CELJU             | 69.62      | 79               | 24         | 0            | 2        | 238    | 197      | 275    | 2.00E-33 | 137       |
| contig02702         | Q12KZ3_SHEDO             | 73.24      | 71               | 19         | 0            | 215      | 3      | 112      | 182    | 5.00E-33 | 136       |
| contig02598         | B6CH67_9BILA             | 49.56      | 113              | 57         | 0            | 22       | 360    | 58       | 170    | 2.00E-32 | 134       |
| contig25780         | A7LS44_BACOV             | 45.71      | 105              | 57         | 0            | 2        | 316    | 556      | 660    | 3.00E-32 | 133       |
| contig16934         | Q21KX4_SACD2             | 68.29      | 82               | 26         | 0            | 2        | 247    | 1413     | 1494   | 1.00E-31 | 131       |
| contig00765         | Q21KX4_SACD2             | 51.35      | 111              | 54         | 0            | 384      | 52     | 1527     | 1637   | 1.00E-31 | 133       |
| contig23140         | Q2SFD8_HAHCH             | 64.56      | 79               | 28         | 0            | 239      | 3      | 160      | 238    | 2.00E-31 | 130       |
| contig01065         | Q11SW6_CYTH3             | 55.71      | 70               | 31         | 0            | 662      | 453    | 210      | 279    | 5.00E-31 | 96.4      |
| contig00382         | A7LS44_BACOV             | 46.15      | 91               | 49         | 0            | 373      | 101    | 807      | 897    | 5.00E-31 | 114       |
| contig13597         | C5BNN7_9GAMM             | 45.54      | 112              | 61         | 0            | 456      | 121    | 332      | 443    | 8.00E-30 | 126       |
| contig06190         | Q11PI8_CYTH3             | 67.53      | 77               | 25         | 0            | 95       | 325    | 23       | 99     | 9.00E-30 | 126       |
| contig11004         | Q11VL4_CYTH3             | 64.38      | 73               | 26         | 0            | 220      | 2      | 141      | 213    | 1.00E-28 | 121       |
| contig20446         | A5ZK01_9BACE             | 56.96      | 79               | 34         | 0            | 3        | 239    | 204      | 282    | 4.00E-28 | 120       |
| contig22358         | C5BPZ6_9GAMM             | 75.86      | 58               | 14         | 0            | 65       | 238    | 53       | 110    | 5.00E-28 | 119       |

Supplementary Table 1. *Cont.*

| Assembled contig ID | UniProt Accession number | % identity | alignment length | mismatches | gap openings | q. start | q. end | s. start | s. end | e-value  | bit score |
|---------------------|--------------------------|------------|------------------|------------|--------------|----------|--------|----------|--------|----------|-----------|
| contig02656         | A9LDW9_9BACT             | 52.58      | 97               | 46         | 0            | 12       | 302    | 485      | 581    | 9.00E-28 | 119       |
| contig10055         | Q21PQ1_SACD2             | 56.25      | 80               | 35         | 0            | 1        | 240    | 117      | 196    | 3.00E-27 | 116       |
| contig02758         | Q21FN3_SACD2             | 47.22      | 72               | 38         | 0            | 217      | 432    | 35       | 106    | 9.00E-27 | 80.3      |
| contig19798         | Q21ID4_SACD2             | 69.49      | 59               | 18         | 0            | 179      | 3      | 93       | 151    | 1.00E-26 | 114       |
| contig06707         | Q11UJ1_CYTH3             | 70         | 60               | 18         | 0            | 3        | 182    | 350      | 409    | 1.00E-26 | 114       |
| contig25876         | B8D159_HALOH             | 53.42      | 73               | 34         | 0            | 219      | 1      | 198      | 270    | 3.00E-26 | 113       |
| contig02648         | Q21NF6_SACD2             | 74.14      | 58               | 15         | 0            | 176      | 3      | 134      | 191    | 4.00E-26 | 112       |
| contig15633         | Q21F54_SACD2             | 52.86      | 70               | 33         | 0            | 1        | 210    | 488      | 557    | 1.00E-25 | 111       |
| contig04461         | Q11VQ4_CYTH3             | 59.09      | 44               | 18         | 0            | 1        | 132    | 1024     | 1067   | 1.00E-25 | 73.5      |
| contig20483         | Q084Z3_SHEFN             | 56.96      | 79               | 34         | 0            | 239      | 3      | 74       | 152    | 4.00E-25 | 110       |
| contig00162         | Q11SW6_CYTH3             | 56.76      | 74               | 32         | 0            | 5        | 226    | 492      | 565    | 1.00E-24 | 109       |
| contig04227         | B1KJF6_SHEWM             | 69.09      | 55               | 17         | 0            | 3        | 167    | 30       | 84     | 1.00E-24 | 108       |
| contig12437         | Q5AU13_EMENI             | 38.74      | 111              | 68         | 0            | 3        | 335    | 393      | 503    | 7.00E-24 | 97.7      |
| contig12453         | Q21G01_SACD2             | 69.09      | 55               | 17         | 0            | 165      | 1      | 260      | 314    | 7.00E-24 | 105       |
| contig26477         | A6EIU7_9SPHI             | 60.32      | 63               | 25         | 0            | 341      | 153    | 188      | 250    | 9.00E-24 | 70.7      |
| contig04615         | Q11VQ4_CYTH3             | 65.08      | 63               | 22         | 0            | 2        | 190    | 714      | 776    | 2.00E-23 | 104       |
| contig16578         | Q47XT7_COLP3             | 76.92      | 52               | 12         | 0            | 239      | 84     | 1867     | 1918   | 5.00E-23 | 103       |
| contig23608         | Q11VQ4_CYTH3             | 51.85      | 54               | 26         | 0            | 70       | 231    | 1011     | 1064   | 6.00E-23 | 80.8      |
| contig01684         | Q11X01_CYTH3             | 57.33      | 75               | 32         | 0            | 853      | 629    | 601      | 675    | 7.00E-23 | 104       |
| contig23338         | Q11PI8_CYTH3             | 64.91      | 57               | 20         | 0            | 319      | 149    | 384      | 440    | 6.00E-22 | 100       |
| contig04241         | BORNG4_XANCB             | 47.06      | 85               | 45         | 0            | 324      | 70     | 536      | 620    | 6.00E-22 | 100       |
| contig17293         | B7RVI9_9GAMM             | 58.46      | 65               | 27         | 0            | 215      | 21     | 253      | 317    | 1.00E-21 | 98.7      |
| contig13913         | COINS7_9BACT             | 43.36      | 113              | 64         | 0            | 341      | 3      | 52       | 164    | 2.00E-21 | 98.2      |
| contig03316         | Q21N31_SACD2             | 54.69      | 64               | 29         | 0            | 195      | 4      | 462      | 525    | 2.00E-21 | 97.7      |
| contig10093         | B3PEQ9_CELJU             | 52.7       | 74               | 35         | 0            | 19       | 240    | 157      | 230    | 3.00E-21 | 97.3      |

Supplementary Table 1. *Cont.*

| Assembled contig ID | UniProt Accession number | % identity | alignment length | mismatches | gap openings | q. start | q. end | s. start | s. end | e-value  | bit score |
|---------------------|--------------------------|------------|------------------|------------|--------------|----------|--------|----------|--------|----------|-----------|
| contig14342         | C1S930_9SPHI             | 44.32      | 88               | 49         | 0            | 599      | 336    | 481      | 568    | 3.00E-21 | 98.7      |
| contig24475         | B2UQH3_AKKM8             | 51.56      | 64               | 31         | 0            | 18       | 209    | 214      | 277    | 5.00E-21 | 96.4      |
| contig02705         | Q2SHX0_HAHCH             | 73.47      | 49               | 13         | 0            | 8        | 154    | 393      | 441    | 9.00E-21 | 95        |
| contig19349         | A0Y0X8_9GAMM             | 55.38      | 65               | 29         | 0            | 31       | 225    | 446      | 510    | 1.00E-20 | 95.5      |
| contig01813         | Q11PI8_CYTH3             | 39.58      | 96               | 58         | 0            | 846      | 559    | 2672     | 2767   | 1.00E-20 | 96.8      |
| contig06502         | A9EU19_SORC5             | 45.57      | 79               | 43         | 0            | 299      | 63     | 115      | 193    | 3.00E-20 | 94.5      |
| contig22983         | Q21ZF8_RHOFD             | 59.65      | 57               | 23         | 0            | 173      | 3      | 109      | 165    | 2.00E-19 | 90.4      |
| contig10599         | A0Y0X8_9GAMM             | 57.38      | 61               | 26         | 0            | 184      | 2      | 446      | 506    | 6.00E-19 | 89.5      |
| contig17731         | A7LS44_BACOV             | 48.61      | 72               | 37         | 0            | 227      | 12     | 545      | 616    | 3.00E-18 | 87.2      |
| contig14052         | Q11T98_CYTH3             | 62.96      | 27               | 10         | 0            | 250      | 330    | 93       | 119    | 4.00E-18 | 46.4      |
| contig11080         | C1S930_9SPHI             | 46.75      | 77               | 41         | 0            | 231      | 1      | 486      | 562    | 6.00E-18 | 86.3      |
| contig00230         | O66185_BACCI             | 57.41      | 54               | 23         | 0            | 10       | 171    | 275      | 328    | 8.00E-18 | 85.4      |
| contig01917         | Q21HS5_SACD2             | 50.82      | 61               | 30         | 0            | 192      | 10     | 348      | 408    | 4.00E-17 | 83.1      |
| contig05872         | Q11UJ1_CYTH3             | 74.42      | 43               | 11         | 0            | 131      | 3      | 352      | 394    | 4.00E-17 | 82.6      |
| contig07156         | Q11VQ4_CYTH3             | 45.95      | 74               | 40         | 0            | 783      | 562    | 1425     | 1498   | 5.00E-17 | 84.9      |
| contig25655         | Q8GRB4_9PSED             | 45         | 80               | 44         | 0            | 575      | 336    | 1        | 80     | 7.00E-17 | 84        |
| contig05967         | C0INS7_9BACT             | 66.2       | 71               | 24         | 0            | 222      | 10     | 500      | 570    | 7.00E-17 | 82.6      |
| contig18210         | Q21F54_SACD2             | 60.78      | 51               | 20         | 0            | 5        | 157    | 514      | 564    | 9.00E-17 | 81.7      |
| contig01984         | Q21KX4_SACD2             | 38.38      | 99               | 61         | 0            | 312      | 16     | 1512     | 1610   | 1.00E-16 | 82.6      |
| contig24905         | Q21KX4_SACD2             | 55.81      | 43               | 19         | 0            | 132      | 4      | 1661     | 1703   | 2.00E-16 | 63.8      |
| contig05199         | Q9BH59_MELIC             | 55.07      | 69               | 31         | 0            | 3        | 209    | 59       | 127    | 2.00E-16 | 80.8      |
| contig06009         | Q11PI9_CYTH3             | 43.66      | 71               | 40         | 0            | 396      | 184    | 2683     | 2753   | 6.00E-16 | 80.3      |
| contig09168         | Q11NQ3_CYTH3             | 49.15      | 59               | 30         | 0            | 191      | 15     | 636      | 694    | 7.00E-16 | 79        |
| contig15044         | Q2SFD8_HAHCH             | 60         | 50               | 20         | 0            | 169      | 20     | 437      | 486    | 8.00E-16 | 79        |
| contig01223         | Q11NQ3_CYTH3             | 63.64      | 44               | 16         | 0            | 96       | 227    | 571      | 614    | 9.00E-16 | 79        |

Supplementary Table 1. *Cont.*

| Assembled contig ID | UniProt Accession number | % identity | alignment length | mismatches | gap openings | q. start | q. end | s. start | s. end | e-value  | bit score |
|---------------------|--------------------------|------------|------------------|------------|--------------|----------|--------|----------|--------|----------|-----------|
| contig04098         | Q308B9_9BACT             | 59.26      | 54               | 22         | 0            | 299      | 138    | 293      | 346    | 1.00E-15 | 79        |
| contig04503         | Q9X3P6_9FIRM             | 70.37      | 27               | 8          | 0            | 1        | 81     | 111      | 137    | 1.00E-15 | 53.3      |
| contig06091         | C4EIC3_STRRS             | 43.55      | 62               | 35         | 0            | 735      | 920    | 63       | 124    | 1.00E-15 | 80.8      |
| contig00650         | A9B2K3_HERA2             | 49.21      | 63               | 32         | 0            | 19       | 207    | 55       | 117    | 1.00E-15 | 78.5      |
| contig05391         | A7V9B3_BACUN             | 56         | 50               | 22         | 0            | 292      | 143    | 253      | 302    | 2.00E-15 | 78.5      |
| contig14108         | A4CA09_9GAMM             | 75         | 40               | 10         | 0            | 4        | 123    | 304      | 343    | 3.00E-15 | 77.1      |
| contig11183         | Q97G04_CLOAB             | 52.83      | 53               | 25         | 0            | 198      | 40     | 35       | 87     | 4.00E-15 | 78.5      |
| contig14858         | Q11PI8_CYTH3             | 87.88      | 33               | 4          | 0            | 95       | 193    | 936      | 968    | 7.00E-15 | 75.8      |
| contig13599         | B3C9G1_9BACE             | 43.55      | 62               | 35         | 0            | 1        | 186    | 450      | 511    | 9.00E-15 | 75.8      |
| contig09264         | B6EH15_ALISL             | 50         | 62               | 31         | 0            | 231      | 46     | 362      | 423    | 1.00E-14 | 75.3      |
| contig07887         | Q21KE5_SACD2             | 72.22      | 36               | 10         | 0            | 1        | 108    | 326      | 361    | 2.00E-14 | 74.4      |
| contig01054         | Q11PI8_CYTH3             | 50         | 58               | 29         | 0            | 636      | 809    | 2702     | 2759   | 3.00E-14 | 76.7      |
| contig01703         | Q21KX4_SACD2             | 86.67      | 30               | 4          | 0            | 129      | 40     | 1088     | 1117   | 3.00E-14 | 68.4      |
| contig07593         | B0ZSE6_9ACTO             | 75         | 32               | 8          | 0            | 97       | 2      | 492      | 523    | 3.00E-14 | 73.5      |
| contig25464         | A6MI38_9SPIT             | 45.9       | 61               | 33         | 0            | 201      | 19     | 167      | 227    | 5.00E-14 | 73        |
| contig14490         | Q18BV5_CLOD6             | 40.26      | 77               | 46         | 0            | 232      | 2      | 62       | 138    | 6.00E-14 | 73        |
| contig07103         | Q21HS9_SACD2             | 42.31      | 78               | 45         | 0            | 156      | 389    | 235      | 312    | 9.00E-14 | 73        |
| contig10391         | B6VYB2_9BACE             | 48.98      | 49               | 25         | 0            | 180      | 34     | 94       | 142    | 1.00E-13 | 72.1      |
| contig10691         | Q11UJ1_CYTH3             | 49.18      | 61               | 31         | 0            | 654      | 472    | 716      | 776    | 1.00E-13 | 73.5      |
| contig02059         | O24820_9BACT             | 53.57      | 56               | 26         | 0            | 341      | 508    | 5        | 60     | 1.00E-13 | 73        |
| contig04779         | Q11PI9_CYTH3             | 47.37      | 57               | 30         | 0            | 507      | 337    | 1355     | 1411   | 1.00E-13 | 73.5      |
| contig11483         | Q3R055_XYLFA             | 58.54      | 41               | 17         | 0            | 51       | 173    | 280      | 320    | 2.00E-13 | 71.2      |
| contig01895         | A4F259_9BACL             | 55.32      | 47               | 21         | 0            | 2        | 142    | 334      | 380    | 3.00E-13 | 70.3      |
| contig09849         | B6QSI9_PENMQ             | 36.89      | 103              | 65         | 0            | 601      | 293    | 241      | 343    | 5.00E-13 | 71.2      |
| contig23872         | B8D1V5_HALOH             | 43.9       | 41               | 23         | 0            | 123      | 1      | 870      | 910    | 6.00E-13 | 53.8      |

Supplementary Table 1. *Cont.*

| Assembled contig ID | UniProt Accession number | % identity | alignment length | mismatches | gap openings | q. start | q. end | s. start | s. end | e-value  | bit score |
|---------------------|--------------------------|------------|------------------|------------|--------------|----------|--------|----------|--------|----------|-----------|
| contig03397         | Q11PI9_CYTH3             | 35.71      | 84               | 54         | 0            | 614      | 363    | 2669     | 2752   | 6.00E-13 | 71.2      |
| contig16794         | C5BPZ6_9GAMM             | 65.71      | 35               | 12         | 0            | 105      | 1      | 189      | 223    | 8.00E-13 | 68.9      |
| contig18313         | B9MKT7_ANATD             | 50.98      | 51               | 25         | 0            | 8        | 160    | 102      | 152    | 9.00E-13 | 68.4      |
| contig14908         | C1Z0L6_PEDHE             | 62.79      | 43               | 16         | 0            | 215      | 343    | 6        | 48     | 1.00E-12 | 69.3      |
| contig17865         | Q11VF9_CYTH3             | 67.65      | 34               | 11         | 0            | 104      | 3      | 409      | 442    | 1.00E-12 | 62.5      |
| contig08385         | Q11PI9_CYTH3             | 52.17      | 69               | 33         | 0            | 209      | 3      | 580      | 648    | 2.00E-12 | 68.4      |
| contig10324         | Q5ZGC9_9CAUD             | 65.71      | 35               | 12         | 0            | 106      | 2      | 115      | 149    | 5.00E-12 | 66.1      |
| contig16511         | Q4UVY1_XANC8             | 50         | 38               | 19         | 0            | 171      | 58     | 79       | 116    | 5.00E-12 | 48.3      |
| contig04307         | A7V9A3_BACUN             | 73.08      | 26               | 7          | 0            | 2        | 79     | 537      | 562    | 7.00E-12 | 47.3      |
| contig01403         | B5JIL5_9BACT             | 54.55      | 44               | 20         | 0            | 2        | 133    | 321      | 364    | 8.00E-12 | 65.7      |
| contig08855         | B9K9B3_THENN             | 36         | 75               | 48         | 0            | 62       | 286    | 200      | 274    | 9.00E-12 | 66.1      |
| contig13936         | A9FK25_SORC5             | 52.27      | 44               | 21         | 0            | 2        | 133    | 18       | 61     | 1.00E-11 | 64.8      |
| contig07270         | C1UVR8_9DELT             | 67.65      | 34               | 11         | 0            | 6        | 107    | 46       | 79     | 1.00E-11 | 63.8      |
| contig20317         | Q092X1_STIAU             | 32.39      | 71               | 48         | 0            | 220      | 8      | 251      | 321    | 2.00E-11 | 64.3      |
| contig13837         | B8CL90_SHEPW             | 63.64      | 33               | 12         | 0            | 100      | 2      | 43       | 75     | 4.00E-11 | 63.4      |
| contig08899         | C1WMF5_9ACTO             | 47.17      | 53               | 28         | 0            | 224      | 382    | 67       | 119    | 4.00E-11 | 64.3      |
| contig12904         | A9EY77_9RHOB             | 56.1       | 41               | 18         | 0            | 124      | 2      | 275      | 315    | 5.00E-11 | 63.4      |
| contig05947         | Q2H8K5_CHAGB             | 27.48      | 131              | 95         | 0            | 1895     | 2287   | 558      | 688    | 5.00E-11 | 66.6      |
| contig02283         | Q9APG3_9PSED             | 45.28      | 53               | 29         | 0            | 6        | 164    | 376      | 428    | 6.00E-11 | 62.9      |
| contig09275         | Q47XT7_COLP3             | 47.06      | 51               | 27         | 0            | 160      | 8      | 160      | 210    | 6.00E-11 | 62.9      |
| contig12768         | Q11PI8_CYTH3             | 36.67      | 60               | 38         | 0            | 222      | 401    | 2693     | 2752   | 1.00E-10 | 62.9      |
| contig15585         | A5WEY2_PSYWF             | 72.73      | 33               | 9          | 0            | 162      | 64     | 82       | 114    | 1.00E-10 | 62        |
| contig00744         | A0Y0X8_9GAMM             | 78.57      | 28               | 6          | 0            | 3        | 86     | 683      | 710    | 2.00E-10 | 61.1      |
| contig26451         | B9XAL6_9BACT             | 43.14      | 51               | 29         | 0            | 154      | 2      | 552      | 602    | 3.00E-10 | 60.2      |
| contig26454         | C1W4K3_9MICO             | 52.94      | 34               | 16         | 0            | 28       | 129    | 316      | 349    | 3.00E-10 | 48.3      |

Supplementary Table 1. *Cont.*

| Assembled contig ID | UniProt Accession number | % identity | alignment length | mismatches | gap openings | q. start | q. end | s. start | s. end | e-value  | bit score |
|---------------------|--------------------------|------------|------------------|------------|--------------|----------|--------|----------|--------|----------|-----------|
| contig16506         | GUN2_CLOJO               | 52.94      | 34               | 16         | 0            | 21       | 122    | 201      | 234    | 4.00E-10 | 54.2      |
| contig20063         | Q12KZ3_SHEDO             | 53.19      | 47               | 22         | 0            | 2        | 142    | 309      | 355    | 5.00E-10 | 59.7      |
| contig10727         | B1VW82_STRGG             | 53.85      | 39               | 18         | 0            | 1        | 117    | 72       | 110    | 6.00E-10 | 58.8      |
| contig04801         | Q21F54_SACD2             | 65.63      | 32               | 11         | 0            | 2        | 97     | 535      | 566    | 6.00E-10 | 58.8      |
| contig14405         | C5FQP0_MICCA             | 30.56      | 72               | 50         | 0            | 269      | 54     | 595      | 666    | 7.00E-10 | 59.7      |
| contig11559         | Q2SFD8_HAHCH             | 58.33      | 36               | 15         | 0            | 148      | 41     | 441      | 476    | 3.00E-09 | 57.4      |
| contig25649         | Q21KX4_SACD2             | 67.65      | 34               | 11         | 0            | 2        | 103    | 1448     | 1481   | 4.00E-09 | 56.5      |
| contig09617         | B7AFY4_9BACE             | 41.18      | 51               | 30         | 0            | 342      | 190    | 46       | 96     | 4.00E-09 | 58.3      |
| contig15196         | Q21KX4_SACD2             | 66.67      | 30               | 10         | 0            | 98       | 9      | 848      | 877    | 7.00E-09 | 56.1      |
| contig09479         | A5FL64_FLAJ1             | 30.67      | 75               | 52         | 0            | 16       | 240    | 378      | 452    | 7.00E-09 | 56.1      |
| contig25208         | Q11PI8_CYTH3             | 46.94      | 49               | 26         | 0            | 53       | 199    | 2682     | 2730   | 8.00E-09 | 55.6      |
| contig05463         | Q2SCY8_HAHCH             | 66.67      | 30               | 10         | 0            | 90       | 1      | 185      | 214    | 1.00E-08 | 55.6      |
| contig14537         | Q9X3P6_9FIRM             | 62.5       | 32               | 12         | 0            | 232      | 137    | 212      | 243    | 2.00E-08 | 54.7      |
| contig25770         | Q11PI9_CYTH3             | 56.41      | 39               | 17         | 0            | 118      | 2      | 8        | 46     | 2.00E-08 | 56.1      |
| contig03641         | B9AN63_9BACT             | 33.93      | 56               | 37         | 0            | 313      | 146    | 249      | 304    | 2.00E-08 | 56.1      |
| contig19790         | C5BTS3_9GAMM             | 51.22      | 41               | 20         | 0            | 124      | 2      | 277      | 317    | 3.00E-08 | 53.3      |
| contig21717         | A4BCU4_9GAMM             | 85.71      | 21               | 3          | 0            | 64       | 2      | 268      | 288    | 3.00E-08 | 52.8      |
| contig09391         | B7RVI9_9GAMM             | 55.88      | 34               | 15         | 0            | 10       | 111    | 264      | 297    | 3.00E-08 | 54.2      |
| contig25883         | Q47XT7_COLP3             | 64.71      | 34               | 12         | 0            | 110      | 9      | 160      | 193    | 4.00E-08 | 54.2      |
| contig26116         | Q11PI9_CYTH3             | 35.71      | 56               | 36         | 0            | 579      | 412    | 2686     | 2741   | 4.00E-08 | 56.5      |
| contig12854         | Q2SHX0_HAHCH             | 51.43      | 35               | 17         | 0            | 179      | 283    | 758      | 792    | 5.00E-08 | 54.2      |
| contig15246         | Q12KZ3_SHEDO             | 33.33      | 75               | 50         | 0            | 234      | 10     | 565      | 639    | 5.00E-08 | 53.3      |
| contig13222         | B7AFY4_9BACE             | 76.92      | 26               | 6          | 0            | 227      | 150    | 241      | 266    | 6.00E-08 | 52.8      |
| contig16115         | C1S6C0_9SPHI             | 42         | 50               | 29         | 0            | 31       | 180    | 503      | 552    | 6.00E-08 | 52.8      |
| contig04127         | Q21N15_SACD2             | 52.94      | 34               | 16         | 0            | 88       | 189    | 199      | 232    | 9.00E-08 | 52.4      |

Supplementary Table 1. *Cont.*

| Assembled contig ID | UniProt Accession number | % identity | alignment length | mismatches | gap openings | q. start | q. end | s. start | s. end | e-value  | bit score |
|---------------------|--------------------------|------------|------------------|------------|--------------|----------|--------|----------|--------|----------|-----------|
| <b>contig14791</b>  | COT375_9PSEU             | 43.48      | 46               | 26         | 0            | 216      | 79     | 32       | 77     | 1.00E-07 | 51.9      |
| <b>contig20202</b>  | Q5BDV7_EMENI             | 66.67      | 30               | 10         | 0            | 117      | 206    | 145      | 174    | 1.00E-07 | 51.9      |
| <b>contig01911</b>  | Q841J5_9ALTE             | 67.86      | 28               | 9          | 0            | 200      | 283    | 362      | 389    | 1.00E-07 | 52.4      |
| <b>contig22348</b>  | B7RVI9_9GAMM             | 46.81      | 47               | 25         | 0            | 142      | 2      | 1099     | 1145   | 1.00E-07 | 51.5      |
| <b>contig25525</b>  | Q21GU0_SACD2             | 39.71      | 68               | 41         | 0            | 259      | 56     | 38       | 105    | 1.00E-07 | 52.8      |
| <b>contig07601</b>  | Q308B8_9BACT             | 41.3       | 46               | 27         | 0            | 138      | 1      | 43       | 88     | 1.00E-07 | 51.9      |
| <b>contig16702</b>  | Q5ART1_EMENI             | 31.11      | 90               | 62         | 0            | 156      | 425    | 95       | 184    | 3.00E-07 | 51.9      |
| <b>contig18707</b>  | A5VF24_SPHWW             | 74.07      | 27               | 7          | 0            | 60       | 140    | 491      | 517    | 3.00E-07 | 50.1      |
| <b>contig18663</b>  | B9KKR0_RHOSK             | 56.45      | 62               | 27         | 0            | 5        | 190    | 352      | 413    | 4.00E-07 | 50.1      |
| <b>contig25920</b>  | Q2SJA2_HAHCH             | 51.43      | 35               | 17         | 0            | 134      | 30     | 717      | 751    | 4.00E-07 | 50.1      |
| <b>contig22036</b>  | O88021_STRCO             | 50         | 34               | 17         | 0            | 183      | 82     | 416      | 449    | 5.00E-07 | 49.6      |
| <b>contig23021</b>  | Q21GJ3_SACD2             | 51.52      | 33               | 16         | 0            | 3        | 101    | 84       | 116    | 5.00E-07 | 48.7      |
| <b>contig04598</b>  | Q11PI8_CYTH3             | 37.29      | 59               | 37         | 0            | 249      | 73     | 2717     | 2775   | 5.00E-07 | 52.4      |
| <b>contig10181</b>  | A2TX55_9FLAO             | 36.76      | 68               | 43         | 0            | 158      | 361    | 815      | 882    | 7.00E-07 | 50.1      |
| <b>contig11249</b>  | Q21GB9_SACD2             | 50         | 34               | 17         | 0            | 5        | 106    | 706      | 739    | 7.00E-07 | 48.3      |
| <b>contig07930</b>  | B5JIL5_9BACT             | 51.43      | 35               | 17         | 0            | 2        | 106    | 51       | 85     | 7.00E-07 | 50.1      |
| <b>contig20761</b>  | O69347_VIBSM             | 71.43      | 21               | 6          | 0            | 79       | 141    | 366      | 386    | 8.00E-07 | 48.7      |
| <b>contig25459</b>  | Q0FSH6_9RHOB             | 52.78      | 36               | 17         | 0            | 121      | 228    | 858      | 893    | 8.00E-07 | 49.2      |
| <b>contig20414</b>  | A7LS44_BACOV             | 50.82      | 61               | 30         | 0            | 1        | 183    | 927      | 987    | 9.00E-07 | 48.7      |
| <b>contig15701</b>  | Q21KX4_SACD2             | 56         | 25               | 11         | 0            | 128      | 54     | 711      | 735    | 1.00E-06 | 37.7      |
| <b>contig25008</b>  | A8XBB0_CAEBR             | 50         | 44               | 22         | 0            | 146      | 15     | 542      | 585    | 1.00E-06 | 48.7      |
| <b>contig00570</b>  | Q11PI8_CYTH3             | 45.95      | 37               | 20         | 0            | 330      | 220    | 2724     | 2760   | 1.00E-06 | 49.2      |
| <b>contig15304</b>  | A9FX20_SORC5             | 64.52      | 31               | 11         | 0            | 2        | 94     | 204      | 234    | 2.00E-06 | 47.3      |
| <b>contig21246</b>  | B1ZLP5_METPB             | 44.12      | 68               | 38         | 0            | 212      | 9      | 329      | 396    | 2.00E-06 | 47.8      |
| <b>contig23584</b>  | Q245S3_TETTH             | 45         | 40               | 22         | 0            | 124      | 5      | 1680     | 1719   | 2.00E-06 | 47.3      |



Supplementary Table 1. *Cont.*

| Assembled contig ID | UniProt Accession number | % identity | alignment length | mismatches | gap openings | q. start | q. end | s. start | s. end | e-value  | bit score |
|---------------------|--------------------------|------------|------------------|------------|--------------|----------|--------|----------|--------|----------|-----------|
| contig00357         | Q3R055_XYLFA             | 55.56      | 27               | 12         | 0            | 19       | 99     | 188      | 214    | 2.00E-06 | 46.9      |
| contig08179         | C1UVR8_9DELT             | 63.33      | 30               | 11         | 0            | 188      | 277    | 31       | 60     | 2.00E-06 | 49.2      |
| contig15332         | Q2SCY8_HAHCH             | 71.43      | 21               | 6          | 0            | 196      | 134    | 264      | 284    | 3.00E-06 | 46.9      |
| contig16110         | BOCET5_ACAM1             | 69.23      | 26               | 8          | 0            | 173      | 96     | 629      | 654    | 3.00E-06 | 46.9      |
| contig16669         | Q21KX4_SACD2             | 69.23      | 26               | 8          | 0            | 27       | 104    | 1274     | 1299   | 3.00E-06 | 46.4      |
| contig17172         | A1ZFU5_9SPHI             | 38.6       | 57               | 35         | 0            | 173      | 3      | 229      | 285    | 3.00E-06 | 47.3      |
| contig06033         | Q55365_SYNY3             | 68         | 25               | 8          | 0            | 521      | 447    | 1017     | 1041   | 4.00E-06 | 48.3      |
| contig04332         | A9B399_HERA2             | 51.52      | 33               | 16         | 0            | 103      | 5      | 226      | 258    | 5.00E-06 | 45.5      |
| contig01518         | A7LS44_BACOV             | 37.7       | 61               | 38         | 0            | 65       | 247    | 810      | 870    | 6.00E-06 | 46.4      |
| contig11361         | Q21GB9_SACD2             | 40.82      | 49               | 29         | 0            | 198      | 52     | 677      | 725    | 7.00E-06 | 46        |
| contig25454         | B5HIM9_STRPR             | 48.72      | 39               | 20         | 0            | 40       | 156    | 19       | 57     | 7.00E-06 | 47.3      |
| contig15581         | Q245S3_TETTH             | 50         | 32               | 16         | 0            | 3        | 98     | 1683     | 1714   | 8.00E-06 | 45.1      |
| contig02861         | A7LS44_BACOV             | 64.29      | 28               | 10         | 0            | 131      | 48     | 683      | 710    | 1.00E-05 | 45.5      |
| contig03003         | A0Y0X8_9GAMM             | 84.21      | 19               | 3          | 0            | 3        | 59     | 691      | 709    | 1.00E-05 | 44.6      |

**Supplementary Table 2.** Summary of 211 sequences with Glycoside Hydrolase similarity used as a blast query against the NCBI-nr database.

| Assembled contig ID | NCBI Accession number and Organism            | % identity | alignment length | q. start | q. end | s. start | s. end | e-value   | bit score |
|---------------------|-----------------------------------------------|------------|------------------|----------|--------|----------|--------|-----------|-----------|
| <b>contig03003</b>  | gi 88859385 Pseudoalteromonas tunicata        | 71.43      | 21               | 3        | 65     | 858      | 878    | 0.038     | 41.2      |
| <b>contig06721</b>  | gi 110640093 Cytophaga hutchinsonii           | 70.94      | 234              | 684      | 1      | 56       | 289    | 4.00E-98  | 361       |
| <b>contig02397</b>  | gi 110638127 Cytophaga hutchinsonii           | 66         | 250              | 117      | 860    | 38       | 286    | 7.00E-101 | 354       |
| <b>contig05603</b>  | gb ABD79822.1 Saccharophagus degradans 2 40   | 54.24      | 177              | 2        | 532    | 86       | 262    | 1.00E-85  | 225       |
| <b>contig26022</b>  | gi 225012305 Flavobacteria bacterium MS024 2A | 53.56      | 267              | 476      | 1273   | 486      | 752    | 3.00E-124 | 304       |
| <b>contig04690</b>  | gi 110640093 Cytophaga hutchinsonii           | 68.92      | 148              | 10       | 450    | 11       | 158    | 9.00E-55  | 216       |
| <b>contig05277</b>  | gi 86140693 Leeuwenhoeekiella blandensis      | 73.97      | 242              | 918      | 1643   | 2        | 243    | 5.00E-104 | 382       |
| <b>contig03455</b>  | Cytophaga hutchinsonii                        | 54.4       | 307              | 2        | 901    | 1016     | 1312   | 2.00E-73  | 280       |
| <b>contig26107</b>  | gi 110637645 Cytophaga hutchinsonii           | 68.06      | 144              | 443      | 12     | 673      | 816    | 9.00E-50  | 199       |
| <b>contig04179</b>  | gi 126646843 Algoriphagus sp PR1              | 55.56      | 153              | 4        | 462    | 105      | 257    | 1.00E-49  | 199       |
| <b>contig07415</b>  | gi 110640093 Cytophaga hutchinsonii           | 71.03      | 107              | 599      | 279    | 236      | 340    | 6.00E-56  | 153       |
| <b>contig02925</b>  | gi 110638127 Cytophaga hutchinsonii           | 80.77      | 104              | 2        | 313    | 443      | 546    | 6.00E-48  | 193       |
| <b>contig01407</b>  | gi 227539966 Sphingobacterium spiritivorum    | 64.6       | 161              | 1370     | 888    | 284      | 444    | 2.00E-59  | 234       |
| <b>contig04013</b>  | gi 110639808 Cytophaga hutchinsonii           | 68.75      | 112              | 337      | 2      | 340      | 451    | 7.00E-44  | 179       |
| <b>contig02917</b>  | gi 78926855 uncultured bacterium              | 68.07      | 119              | 31       | 387    | 223      | 341    | 3.00E-43  | 177       |
| <b>contig12578</b>  | gi 254788171 Teredinibacter turnerae T7901    | 54.55      | 99               | 555      | 259    | 629      | 727    | 1.00E-57  | 120       |
| <b>contig05485</b>  | gi 78926927 uncultured bacterium              | 60.24      | 166              | 502      | 8      | 227      | 392    | 6.00E-44  | 180       |
| <b>contig25936</b>  | gi 242260148 Clostridium cellulovorans 743B   | 52.51      | 179              | 588      | 52     | 85       | 250    | 8.00E-46  | 187       |
| <b>contig00226</b>  | gi 110639807 Cytophaga hutchinsonii           | 67.11      | 152              | 459      | 10     | 107      | 258    | 3.00E-44  | 181       |
| <b>contig04413</b>  | gi 124006662 Microscilla marina               | 73.88      | 134              | 751      | 350    | 10       | 143    | 2.00E-50  | 202       |
| <b>contig26301</b>  | gi 110639807 Cytophaga hutchinsonii           | 60.36      | 111              | 339      | 7      | 839      | 947    | 3.00E-36  | 154       |
| <b>contig25564</b>  | gi 110638770 Cytophaga hutchinsonii           | 59.69      | 129              | 395      | 9      | 314      | 442    | 2.00E-40  | 168       |
| <b>contig08782</b>  | gi 110639808 Cytophaga hutchinsonii           | 72.04      | 93               | 285      | 7      | 467      | 559    | 1.00E-32  | 142       |
| <b>contig05185</b>  | gi 242239319 Dickeya dadantii                 | 56.91      | 123              | 8        | 373    | 119      | 241    | 6.00E-37  | 156       |
| <b>contig05113</b>  | gi 254787279 Teredinibacter turnerae T7901    | 57.14      | 133              | 74       | 451    | 501      | 633    | 2.00E-39  | 164       |

Supplementary Table 2. *Cont.*

| Assembled contig ID | NCBI Accession number and Organism           | % identity | alignment length | q. start | q. end | s. start | s. end | e-value  | bit score |
|---------------------|----------------------------------------------|------------|------------------|----------|--------|----------|--------|----------|-----------|
| <b>contig04687</b>  | gi 254787186 protein Teredinibacter turnerae | 68.18      | 88               | 3        | 266    | 82       | 169    | 9.00E-31 | 136       |
| <b>contig15223</b>  | gi 110639808 Cytophaga hutchinsonii          | 67.44      | 86               | 15       | 272    | 616      | 701    | 3.00E-30 | 134       |
| <b>contig04664</b>  | gi 90019972 Saccharophagus degradans 2 40    | 64.39      | 132              | 397      | 2      | 498      | 629    | 1.00E-48 | 195       |
| <b>contig08470</b>  | gi 110637740 Cytophaga hutchinsonii          | 54.4       | 125              | 627      | 998    | 1        | 119    | 1.00E-31 | 141       |
| <b>contig17088</b>  | gi 115334997 uncultured bacterium            | 46.99      | 166              | 3        | 491    | 324      | 486    | 2.00E-40 | 168       |
| <b>contig01678</b>  | gi 90022135 Saccharophagus degradans 2 40    | 53.92      | 102              | 308      | 3      | 412      | 513    | 4.00E-28 | 127       |
| <b>contig18893</b>  | gi 71281571 Colwellia psychrerythraea 34H    | 72.15      | 79               | 239      | 3      | 227      | 305    | 3.00E-27 | 124       |
| <b>contig08844</b>  | gi 260062808 Robiginitalea biformata         | 69.74      | 76               | 236      | 9      | 166      | 241    | 3.00E-26 | 121       |
| <b>contig24355</b>  | gi 90022638 Saccharophagus degradans         | 67.5       | 80               | 240      | 1      | 53       | 132    | 4.00E-26 | 120       |
| <b>contig14077</b>  | gi 192361876 Cellvibrio japonicus            | 69.62      | 79               | 2        | 238    | 197      | 275    | 3.00E-25 | 117       |
| <b>contig02702</b>  | gi 91793955 Shewanella denitrificans         | 73.24      | 71               | 215      | 3      | 112      | 182    | 7.00E-25 | 116       |
| <b>contig02598</b>  | gi 242239319 Dickeya dadantii                | 51.61      | 124              | 1        | 372    | 70       | 193    | 2.00E-31 | 138       |
| <b>contig25780</b>  | gi 255607952 Ricinus communis                | 66.67      | 105              | 2        | 316    | 210      | 314    | 2.00E-33 | 145       |
| <b>contig16934</b>  | gi 90021040 Saccharophagus degradans 2 40    | 68.29      | 82               | 2        | 247    | 1413     | 1494   | 1.00E-23 | 112       |
| <b>contig00765</b>  | gi 88803060 Polaribacter irgensii            | 61.63      | 172              | 510      | 1      | 262      | 433    | 9.00E-56 | 219       |
| <b>contig23140</b>  | gi 83646626 Hahella chejuensis               | 64.56      | 79               | 239      | 3      | 160      | 238    | 2.00E-23 | 112       |
| <b>contig01065</b>  | gi 110638631 Cytophaga hutchinsonii          | 45.32      | 267              | 773      | 6      | 177      | 438    | 6.00E-57 | 224       |
| <b>contig00382</b>  | gi 86143269 Leeuwenhoekia blandensis         | 68.99      | 129              | 400      | 14     | 620      | 748    | 3.00E-48 | 194       |
| <b>contig13597</b>  | gi 254784817 Teredinibacter turnerae T7901   | 45.54      | 112              | 456      | 121    | 332      | 443    | 1.00E-26 | 108       |
| <b>contig06190</b>  | gi 110639808 Cytophaga hutchinsonii          | 70         | 80               | 95       | 325    | 20       | 99     | 2.00E-22 | 108       |
| <b>contig11004</b>  | gi 110637685 Cytophaga hutchinsonii          | 64.38      | 73               | 220      | 2      | 141      | 213    | 4.00E-21 | 104       |
| <b>contig20446</b>  | gi 237719706 Bacteroides sp                  | 56.96      | 79               | 3        | 239    | 201      | 279    | 8.00E-21 | 103       |
| <b>contig22358</b>  | gi 254787186 Teredinibacter turnerae T7901   | 75.86      | 58               | 65       | 238    | 53       | 110    | 6.00E-25 | 102       |
| <b>contig02656</b>  | gi 78926900 uncultured bacterium             | 53.06      | 98               | 9        | 302    | 469      | 559    | 4.00E-23 | 110       |
| <b>contig10055</b>  | gi 90019713 Saccharophagus degradans 2 40    | 56.25      | 80               | 1        | 240    | 117      | 196    | 5.00E-20 | 100       |
| <b>contig02758</b>  | gi 90022881 Saccharophagus degradans 2 40    | 47.22      | 72               | 217      | 432    | 35       | 106    | 2.00E-19 | 69.7      |

Supplementary Table 2. *Cont.*

| Assembled contig ID | NCBI Accession number and Organism        | % identity | alignment length | q. start | q. end | s. start | s. end | e-value  | bit score |
|---------------------|-------------------------------------------|------------|------------------|----------|--------|----------|--------|----------|-----------|
| <b>contig19798</b>  | gi 90021930 Saccharophagus degradans 2 40 | 69.49      | 59               | 179      | 3      | 93       | 151    | 2.00E-19 | 98.6      |
| <b>contig06707</b>  | gi 110638056 Cytophaga hutchinsonii       | 70         | 60               | 3        | 182    | 350      | 409    | 2.00E-19 | 98.6      |
| <b>contig25876</b>  | gi 242259850 Clostridium cellulovorans    | 57.5       | 80               | 222      | 1      | 249      | 327    | 5.00E-20 | 100       |
| <b>contig02648</b>  | gi 90020158 Saccharophagus degradans 2 40 | 74.14      | 58               | 176      | 3      | 134      | 191    | 6.00E-19 | 97.1      |
| <b>contig15633</b>  | gi 90023060 Saccharophagus degradans 2 40 | 52.86      | 70               | 1        | 210    | 488      | 557    | 1.00E-18 | 96.3      |
| <b>contig04461</b>  | gi 110638770 Cytophaga hutchinsonii       | 45.53      | 123              | 1        | 363    | 436      | 555    | 2.00E-21 | 106       |
| <b>contig20483</b>  | gi 212634478 Shewanella piezotolerans     | 56.96      | 79               | 239      | 3      | 69       | 147    | 3.00E-18 | 94.7      |
| <b>contig00162</b>  | gi 110638631 Cytophaga hutchinsonii       | 56.76      | 74               | 5        | 226    | 492      | 565    | 5.00E-18 | 94        |
| <b>contig04227</b>  | gi 170728697 Shewanella woodyi            | 69.09      | 55               | 3        | 167    | 30       | 84     | 9.00E-18 | 93.2      |
| <b>contig12437</b>  | gi 110637223 Cytophaga hutchinsonii       | 76.32      | 114              | 3        | 344    | 264      | 377    | 4.00E-88 | 200       |
| <b>contig12453</b>  | gi 90022763 Saccharophagus degradans 2 40 | 69.09      | 55               | 165      | 1      | 260      | 314    | 4.00E-17 | 90.9      |
| <b>contig26477</b>  | gi 261404702 Geobacillus sp               | 65.26      | 95               | 437      | 153    | 161      | 251    | 7.00E-30 | 111       |
| <b>contig04615</b>  | gi 110637645 Cytophaga hutchinsonii       | 65.08      | 63               | 2        | 190    | 714      | 776    | 1.00E-16 | 89.7      |
| <b>contig16578</b>  | gi 71281571 Colwellia psychrerythraea     | 76.92      | 52               | 239      | 84     | 1867     | 1918   | 2.00E-16 | 89        |
| <b>contig23608</b>  | gi 110638770 Cytophaga hutchinsonii       | 57.69      | 78               | 1        | 231    | 399      | 476    | 2.00E-21 | 105       |
| <b>contig01684</b>  | gi 110637198 Cytophaga hutchinsonii       | 44.59      | 148              | 886      | 452    | 592      | 736    | 1.00E-26 | 124       |
| <b>contig23338</b>  | gi 110639808 Cytophaga hutchinsonii       | 46.02      | 113              | 319      | 2      | 384      | 496    | 3.00E-19 | 98.2      |
| <b>contig04241</b>  | gi 159897669 Herpetosiphon aurantiacus    | 50.93      | 108              | 318      | 1      | 111      | 218    | 3.00E-24 | 114       |
| <b>contig17293</b>  | gi 83645744 Hahella chejuensis            | 60         | 65               | 215      | 21     | 576      | 640    | 3.00E-16 | 88.2      |
| <b>contig13913</b>  | gi 192361876 Cellvibrio japonicus         | 45.13      | 113              | 341      | 3      | 85       | 197    | 2.00E-20 | 102       |
| <b>contig03316</b>  | gi 90020283 Saccharophagus degradans 2 40 | 54.69      | 64               | 195      | 4      | 462      | 525    | 4.00E-15 | 84.3      |
| <b>contig10093</b>  | gi 192361876 Cellvibrio japonicus         | 52.7       | 74               | 19       | 240    | 157      | 230    | 5.00E-15 | 84        |
| <b>contig14342</b>  | gi 110637461 Cytophaga hutchinsonii       | 46.15      | 91               | 599      | 330    | 868      | 958    | 6.00E-19 | 97.8      |
| <b>contig24475</b>  | gi 153808937 Bacteroides caccae           | 50.68      | 73               | 21       | 239    | 201      | 273    | 5.00E-16 | 87.4      |
| <b>contig02705</b>  | gi 83645744 Hahella chejuensis            | 73.47      | 49               | 8        | 154    | 393      | 441    | 2.00E-14 | 82        |
| <b>contig19349</b>  | gi 119469861 Alteromonadales bacterium    | 53.95      | 76               | 1        | 225    | 435      | 510    | 2.00E-16 | 88.6      |

Supplementary Table 2. *Cont.*

| Assembled contig ID | NCBI Accession number and Organism                   | % identity | alignment length | q. start | q. end | s. start | s. end | e-value  | bit score |
|---------------------|------------------------------------------------------|------------|------------------|----------|--------|----------|--------|----------|-----------|
| <b>contig01813</b>  | gi 110639806 <i>Cytophaga hutchinsonii</i>           | 39.17      | 120              | 846      | 505    | 2319     | 2437   | 8.00E-19 | 98.6      |
| <b>contig06502</b>  | gi 254787279 <i>Teredinibacter turnerae</i>          | 49.54      | 109              | 323      | 3      | 311      | 414    | 5.00E-26 | 120       |
| <b>contig22983</b>  | gi 90022638 <i>Saccharophagus degradans</i> 2 40     | 59.65      | 57               | 173      | 3      | 102      | 158    | 1.00E-14 | 82.8      |
| <b>contig10599</b>  | gi 119469861 <i>Alteromonadales bacterium</i>        | 55.13      | 78               | 232      | 2      | 429      | 506    | 2.00E-15 | 85.1      |
| <b>contig17731</b>  | gi 110640149 <i>Cytophaga hutchinsonii</i>           | 56         | 75               | 227      | 3      | 231      | 305    | 4.00E-16 | 87.8      |
| <b>contig14052</b>  | gi 162449739 <i>Sorangium cellulosum</i>             | 54.24      | 59               | 154      | 330    | 151      | 208    | 1.00E-16 | 68.9      |
| <b>contig11080</b>  | gi 110637461 <i>Cytophaga hutchinsonii</i>           | 43.59      | 78               | 231      | 1      | 873      | 950    | 2.00E-13 | 79        |
| <b>contig00230</b>  | gi 3090434 <i>Bacillus circulans</i>                 | 57.14      | 56               | 10       | 174    | 275      | 330    | 4.00E-12 | 74.3      |
| <b>contig01917</b>  | gi 90022139 <i>Saccharophagus degradans</i> 2 40     | 50.82      | 61               | 192      | 10     | 348      | 408    | 2.00E-11 | 72        |
| <b>contig05872</b>  | gi 110638056 <i>Cytophaga hutchinsonii</i>           | 74.42      | 43               | 131      | 3      | 352      | 394    | 3.00E-11 | 71.6      |
| <b>contig07156</b>  | gi 256424202 <i>Chitinophaga pinensis</i>            | 42.67      | 225              | 783      | 121    | 19       | 243    | 2.00E-37 | 160       |
| <b>contig25655</b>  | gi 90019761 <i>Saccharophagus degradans</i> 2 40     | 51.22      | 82               | 334      | 89     | 696      | 776    | 3.00E-27 | 79.7      |
| <b>contig05967</b>  | gi 56675038 uncultured bacterium                     | 70.42      | 71               | 222      | 10     | 497      | 564    | 9.00E-12 | 73.2      |
| <b>contig18210</b>  | gi 90023060 <i>Saccharophagus degradans</i> 2 40     | 60.78      | 51               | 5        | 157    | 514      | 564    | 5.00E-11 | 70.9      |
| <b>contig01984</b>  | gi 254785013 <i>Teredinibacter turnerae</i> T7901    | 58.74      | 143              | 432      | 4      | 279      | 420    | 8.00E-40 | 166       |
| <b>contig24905</b>  | gi 91792085 <i>Shewanella denitrificans</i> OS217    | 63.49      | 63               | 192      | 4      | 483      | 544    | 3.00E-16 | 88.2      |
| <b>contig05199</b>  | gi 17826951 <i>Pseudomonas</i> sp ND137              | 61.43      | 70               | 3        | 209    | 181      | 250    | 5.00E-12 | 73.9      |
| <b>contig06009</b>  | gi 110639300 <i>Cytophaga hutchinsonii</i>           | 43.3       | 97               | 411      | 133    | 467      | 561    | 2.00E-18 | 95.5      |
| <b>contig09168</b>  | gi 110638770 <i>Cytophaga hutchinsonii</i>           | 55.74      | 61               | 191      | 9      | 453      | 513    | 1.00E-12 | 75.9      |
| <b>contig15044</b>  | gi 83646626 <i>Hahella chejuensis</i>                | 60         | 50               | 169      | 20     | 437      | 486    | 2.00E-10 | 68.6      |
| <b>contig01223</b>  | gi 110638770 <i>Cytophaga hutchinsonii</i>           | 59.15      | 71               | 6        | 218    | 355      | 425    | 2.00E-19 | 99        |
| <b>contig04098</b>  | gi 78926855 uncultured bacterium                     | 52.94      | 102              | 299      | 3      | 293      | 394    | 2.00E-22 | 108       |
| <b>contig04503</b>  | gi 254443020 <i>Verrucomicrobiae bacterium</i>       | 72.06      | 68               | 1        | 201    | 92       | 159    | 5.00E-24 | 114       |
| <b>contig06091</b>  | gi 68525474 <i>Flavobacterium</i> sp MSY2            | 67.63      | 173              | 1        | 519    | 199      | 371    | 1.00E-65 | 254       |
| <b>contig00650</b>  | gi 256393254 protein <i>Catenulispora acidiphila</i> | 56.92      | 65               | 19       | 213    | 705      | 769    | 1.00E-13 | 79.3      |
| <b>contig05391</b>  | gi 254788171 protein <i>Teredinibacter turnerae</i>  | 55         | 80               | 289      | 53     | 225      | 304    | 7.00E-18 | 93.6      |

Supplementary Table 2. *Cont.*

| Assembled contig ID | NCBI Accession number and Organism            | % identity | alignment length | q. start | q. end | s. start | s. end | e-value  | bit score |
|---------------------|-----------------------------------------------|------------|------------------|----------|--------|----------|--------|----------|-----------|
| <b>contig14108</b>  | gi 8885938 Pseudoalteromonas tunicata         | 64.71      | 51               | 4        | 156    | 304      | 349    | 3.00E-10 | 68.2      |
| <b>contig11183</b>  | gi 125973914 Clostridium thermocellum         | 45.56      | 90               | 255      | 1      | 11       | 100    | 2.00E-13 | 80.5      |
| <b>contig14858</b>  | gi 110639808 Cytophaga hutchinsonii           | 74.24      | 66               | 2        | 193    | 903      | 968    | 4.00E-21 | 104       |
| <b>contig13599</b>  | gi 189464233 Bacteroides intestinalis         | 63.29      | 79               | 1        | 237    | 77       | 155    | 6.00E-24 | 113       |
| <b>contig09264</b>  | gi 110637461 Cytophaga hutchinsonii           | 48.72      | 78               | 231      | 1      | 732      | 809    | 1.00E-12 | 75.9      |
| <b>contig07887</b>  | gi 90021219 Saccharophagus degradans 2 40     | 72.22      | 36               | 1        | 108    | 326      | 361    | 3.00E-09 | 64.7      |
| <b>contig01054</b>  | gi 110638938 2552 Cytophaga hutchinsonii      | 28.72      | 282              | 66       | 887    | 476      | 732    | 4.00E-20 | 103       |
| <b>contig01703</b>  | gi 88799706 oxidoreductase Reinekea sp        | 90         | 30               | 129      | 40     | 455      | 484    | 2.00E-09 | 60.8      |
| <b>contig07593</b>  | gi 166835917 Streptomyces sp s6 204           | 75         | 32               | 97       | 2      | 492      | 523    | 5.00E-09 | 63.9      |
| <b>contig25464</b>  | gi 254787942 Teredinibacter turnerae          | 68.66      | 67               | 204      | 4      | 182      | 248    | 2.00E-19 | 98.6      |
| <b>contig14490</b>  | gi 110639833 Cytophaga hutchinsonii           | 83.33      | 78               | 235      | 2      | 57       | 134    | 2.00E-30 | 135       |
| <b>contig07103</b>  | gi 90022135 Saccharophagus degradans 2 40     | 39.26      | 135              | 3        | 389    | 179      | 312    | 2.00E-16 | 89        |
| <b>contig10391</b>  | gi 254786327 Teredinibacter turnerae T7901    | 74.68      | 79               | 240      | 4      | 352      | 426    | 2.00E-27 | 125       |
| <b>contig10691</b>  | gi 110638056 Cytophaga hutchinsonii           | 35.38      | 130              | 654      | 277    | 716      | 845    | 2.00E-12 | 76.6      |
| <b>contig02059</b>  | gi 237718505 Bacteroides sp                   | 46.73      | 107              | 212      | 520    | 13       | 119    | 1.00E-21 | 106       |
| <b>contig04779</b>  | gi 110639807 Cytophaga hutchinsonii           | 37.6       | 125              | 609      | 241    | 1324     | 1445   | 3.00E-15 | 85.9      |
| <b>contig11483</b>  | gi 15837868 ref NP_298556.1                   | 58.54      | 41               | 51       | 173    | 280      | 320    | 2.00E-08 | 62        |
| <b>contig01895</b>  | gi 283846038 Bacillus cellulosilyticus        | 56         | 50               | 2        | 151    | 330      | 379    | 9.00E-09 | 63.2      |
| <b>contig09849</b>  | gi 124003516 dehydrogenase Microscilla marina | 59.15      | 213              | 622      | 2      | 239      | 451    | 1.00E-63 | 246       |
| <b>contig23872</b>  | gi 163786454 Flavobacteriales bacterium       | 84.48      | 58               | 174      | 1      | 160      | 217    | 4.00E-23 | 110       |
| <b>contig03397</b>  | gi 149277963 Pedobacter sp BAL39              | 41.51      | 106              | 677      | 363    | 1072     | 1176   | 4.00E-14 | 82.4      |
| <b>contig16794</b>  | gi 254787186 Teredinibacter turnerae T7901    | 65.71      | 35               | 105      | 1      | 189      | 223    | 8.00E-08 | 60.1      |
| <b>contig18313</b>  | gi 254445795 Verrucomicrobiae bacterium       | 62.75      | 51               | 5        | 157    | 66       | 116    | 8.00E-13 | 76.6      |
| <b>contig14908</b>  | gi 227539966 Sphingobacterium spiritivorum    | 71.11      | 45               | 209      | 343    | 5        | 49     | 3.00E-12 | 74.7      |
| <b>contig17865</b>  | gi 110637740 Cytophaga hutchinsonii           | 55.56      | 81               | 227      | 3      | 362      | 442    | 5.00E-16 | 87.4      |
| <b>contig08385</b>  | gi 110639807 Cytophaga hutchinsonii           | 46.92      | 130              | 380      | 3      | 519      | 648    | 3.00E-23 | 111       |

Supplementary Table 2. *Cont.*

| Assembled contig ID | NCBI Accession number and Organism          | % identity | alignment length | q. start | q. end | s. start | s. end | e-value  | bit score |
|---------------------|---------------------------------------------|------------|------------------|----------|--------|----------|--------|----------|-----------|
| <b>contig10324</b>  | gi 53793624 Flavobacterium phage.11b        | 65.71      | 35               | 106      | 2      | 115      | 149    | 4.00E-07 | 57.8      |
| <b>contig16511</b>  | gi 21231824 Xanthomonas campestris          | 50         | 38               | 171      | 58     | 79       | 116    | 4.00E-07 | 42.7      |
| <b>contig04307</b>  | gi 254788171 Teredinibacter turnerae T7901  | 87.5       | 24               | 8        | 79     | 512      | 535    | 3.00E-07 | 43.9      |
| <b>contig01403</b>  | gi 254788056 Teredinibacter turnerae T7901  | 59.38      | 64               | 5        | 196    | 339      | 402    | 3.00E-15 | 84.7      |
| <b>contig08855</b>  | gi 254786327 Teredinibacter turnerae T7901  | 74.42      | 86               | 56       | 313    | 494      | 579    | 5.00E-31 | 137       |
| <b>contig13936</b>  | gi 162449739 Sorangium cellulosum           | 59.09      | 44               | 2        | 133    | 134      | 175    | 2.00E-07 | 58.5      |
| <b>contig07270</b>  | gi 262197465 Haliangium ochraceum           | 67.65      | 34               | 6        | 107    | 67       | 100    | 2.00E-06 | 55.8      |
| <b>contig20317</b>  | gi 83643752 Hahella chejuensis KCTC 2396    | 40.79      | 76               | 229      | 2      | 401      | 472    | 7.00E-10 | 67        |
| <b>contig13837</b>  | gi 212634478 Shewanella piezotolerans WP3   | 63.64      | 33               | 100      | 2      | 43       | 75     | 2.00E-06 | 55.5      |
| <b>contig08899</b>  | gi 256421052 Chitinophaga pinensis DSM 2588 | 47.54      | 61               | 206      | 382    | 29       | 89     | 9.00E-07 | 56.6      |
| <b>contig12904</b>  | gi 269218354 Actinomyces sp                 | 46.84      | 79               | 238      | 2      | 234      | 310    | 7.00E-12 | 73.6      |
| <b>contig05947</b>  | gi 126648235 Algoriphagus sp                | 72.54      | 244              | 2        | 733    | 272      | 514    | 8.00E-91 | 339       |
| <b>contig02283</b>  | gi 261416250 Fibrobacter succinogenes       | 39.22      | 51               | 6        | 158    | 428      | 478    | 4.00E-08 | 45.1      |
| <b>contig09275</b>  | gi 119502900 marine gamma proteobacterium   | 53.95      | 76               | 229      | 2      | 390      | 465    | 2.00E-11 | 72        |
| <b>contig12768</b>  | gi 110639806 Cytophaga hutchinsonii         | 36.67      | 60               | 222      | 401    | 2340     | 2399   | 3.00E-06 | 55.1      |
| <b>contig15585</b>  | gi 148653080 Psychrobacter sp               | 72.73      | 33               | 162      | 64     | 82       | 114    | 4.00E-06 | 54.3      |
| <b>contig00744</b>  | gi 88859385 Pseudoalteromonas tunicata      | 72.73      | 33               | 3        | 98     | 680      | 712    | 2.00E-06 | 55.5      |
| <b>contig26451</b>  | gi 223934655 bacterium Ellin514             | 43.14      | 51               | 154      | 2      | 552      | 602    | 1.00E-05 | 52.8      |
| <b>contig26454</b>  | gi 282869827 Streptomyces sp                | 43.04      | 79               | 25       | 207    | 295      | 373    | 3.00E-08 | 61.6      |
| <b>contig16506</b>  | gi 585231 Clostridium josui                 | 52.94      | 34               | 21       | 122    | 201      | 234    | 2.00E-05 | 47.8      |
| <b>contig20063</b>  | gi 192360365 Cellvibrio japonicus           | 45.45      | 55               | 2        | 160    | 376      | 430    | 2.00E-05 | 52.4      |
| <b>contig10727</b>  | gi 260913278 Pasteurella dagmatis           | 72.97      | 37               | 4        | 114    | 18       | 54     | 4.00E-08 | 61.2      |
| <b>contig04801</b>  | gi 90023060 Saccharophagus degradans 2 40   | 65.63      | 32               | 2        | 97     | 535      | 566    | 3.00E-05 | 51.6      |
| <b>contig14405</b>  | gi 202953357 Debaryomyces hansenii          | 32.95      | 88               | 269      | 9      | 229      | 316    | 2.00E-10 | 68.6      |
| <b>contig11559</b>  | gi 253573954 Paenibacillus sp               | 50.75      | 67               | 226      | 41     | 231      | 297    | 5.00E-07 | 57.4      |
| <b>contig25649</b>  | gi 90021040 Saccharophagus degradans 2 40   | 67.65      | 34               | 2        | 103    | 1448     | 1481   | 5.00E-09 | 49.7      |

Supplementary Table 2. *Cont.*

| Assembled contig ID | NCBI Accession number and Organism                     | % identity | alignment length | q. start | q. end | s. start | s. end | e-value  | bit score |
|---------------------|--------------------------------------------------------|------------|------------------|----------|--------|----------|--------|----------|-----------|
| <b>contig09617</b>  | gi 110637643 <i>Cytophaga hutchinsonii</i>             | 65.41      | 133              | 390      | 1      | 27       | 159    | 8.00E-45 | 183       |
| <b>contig15196</b>  | gi 90021040 <i>Saccharophagus degradans</i> 2 40       | 49.33      | 75               | 230      | 9      | 968      | 1032   | 1.00E-10 | 69.7      |
| <b>contig09479</b>  | gi 163753699 <i>Kordia algicida</i>                    | 51.25      | 80               | 1        | 240    | 254      | 333    | 9.00E-18 | 93.2      |
| <b>contig25208</b>  | gi 110639806 <i>Cytophaga hutchinsonii</i>             | 46.94      | 49               | 53       | 199    | 2329     | 2377   | 2.00E-04 | 48.9      |
| <b>contig05463</b>  | gi 83645744 <i>Hahella chejuensis</i>                  | 51.47      | 68               | 195      | 4      | 701      | 768    | 2.00E-12 | 75.1      |
| <b>contig14537</b>  | gi 150002649 <i>Bacteroides vulgatus</i>               | 48.08      | 52               | 156      | 1      | 219      | 270    | 5.00E-15 | 57.4      |
| <b>contig25770</b>  | gi 124002135 <i>Microscilla marina</i>                 | 65.47      | 139              | 363      | 776    | 1        | 137    | 3.00E-44 | 182       |
| <b>contig03641</b>  | gi 254785542 <i>Teredinibacter turnerae</i> T7901      | 72.79      | 136              | 544      | 137    | 204      | 339    | 5.00E-53 | 210       |
| <b>contig19790</b>  | gi 188990414 <i>Xanthomonas campestris</i>             | 47.37      | 57               | 166      | 2      | 82       | 138    | 2.00E-06 | 55.5      |
| <b>contig21717</b>  | gi 88798396 <i>glucanase Reinekea</i> sp               | 85.71      | 21               | 64       | 2      | 268      | 288    | 0.001    | 46.6      |
| <b>contig09391</b>  | gi 110637461 <i>Cytophaga hutchinsonii</i>             | 48.61      | 72               | 13       | 228    | 844      | 915    | 4.00E-16 | 87.8      |
| <b>contig25883</b>  | gi 119502900 <i>marine gamma proteobacterium</i>       | 45.07      | 71               | 221      | 9      | 576      | 644    | 3.00E-12 | 61.6      |
| <b>contig26116</b>  | gi 124009083 <i>Microscilla marina</i>                 | 33.12      | 157              | 780      | 334    | 1498     | 1648   | 2.00E-17 | 95.1      |
| <b>contig12854</b>  | gi 55376769 <i>protein Haloarcula marismortui</i>      | 45.3       | 117              | 68       | 418    | 546      | 658    | 2.00E-22 | 108       |
| <b>contig15246</b>  | gi 91793955 <i>Shewanella denitrificans</i> OS217      | 47.37      | 76               | 234      | 10     | 565      | 639    | 2.00E-13 | 78.6      |
| <b>contig13222</b>  | gi 110637643 <i>Cytophaga hutchinsonii</i> ATCC        | 67.09      | 79               | 227      | 3      | 240      | 316    | 8.00E-21 | 103       |
| <b>contig16115</b>  | gi 269963230 <i>Vibrio harveyi</i>                     | 47.76      | 67               | 1        | 198    | 233      | 299    | 5.00E-08 | 60.8      |
| <b>contig04127</b>  | gi 256396581 <i>Catenulispora acidiphila</i> DSM 44928 | 48.1       | 79               | 1        | 237    | 217      | 293    | 1.00E-15 | 86.3      |
| <b>contig14791</b>  | gi 19262983 <i>Pseudomonas</i> sp                      | 45.61      | 57               | 201      | 31     | 27       | 82     | 3.00E-06 | 55.1      |
| <b>contig20202</b>  | gi 259488404 <i>Aspergillus nidulans</i>               | 62.16      | 37               | 117      | 227    | 103      | 136    | 0.001    | 46.6      |
| <b>contig01911</b>  | gi 119502900 <i>marine gamma proteobacterium</i>       | 53.62      | 69               | 80       | 286    | 591      | 659    | 2.00E-12 | 71.2      |
| <b>contig22348</b>  | gi 90021040 <i>Saccharophagus degradans</i> 2 40       | 59.57      | 47               | 142      | 2      | 1484     | 1530   | 2.00E-08 | 62        |
| <b>contig25525</b>  | gi 120436187 <i>Gramella forsetii</i> KT0803           | 49.21      | 126              | 379      | 2      | 2267     | 2392   | 1.00E-26 | 122       |
| <b>contig07601</b>  | gi 283844144 <i>Bacillus cellulosilyticus</i>          | 38.04      | 92               | 249      | 7      | 1        | 89     | 9.00E-07 | 56.6      |
| <b>contig16702</b>  | gi 53803512 <i>Methylococcus capsulatus</i>            | 36.77      | 155              | 30       | 488    | 104      | 254    | 2.00E-17 | 92.8      |
| <b>contig18707</b>  | gi 239820612 <i>Variovorax paradoxus</i>               | 71.88      | 32               | 57       | 152    | 39       | 70     | 2.00E-05 | 52.4      |



Supplementary Table 2. *Cont.*

| Assembled contig ID | NCBI Accession number and Organism             | % identity | alignment length | q. start | q. end | s. start | s. end | e-value  | bit score |
|---------------------|------------------------------------------------|------------|------------------|----------|--------|----------|--------|----------|-----------|
| <b>contig18663</b>  | gi 83950901 Roseovarius nubinhibens            | 59.72      | 72               | 2        | 217    | 318      | 389    | 7.00E-12 | 73.6      |
| <b>contig25920</b>  | gi 115372711 Stigmatella aurantiaca            | 44.29      | 70               | 203      | 3      | 2165     | 2234   | 3.00E-07 | 58.2      |
| <b>contig22036</b>  | gi 220928668 Clostridium cellulolyticum        | 54.17      | 48               | 177      | 34     | 1047     | 1094   | 7.00E-10 | 67        |
| <b>contig23021</b>  | gi 90022139 Saccharophagus degradans 2 40      | 54.55      | 33               | 3        | 101    | 379      | 411    | 0.001    | 46.6      |
| <b>contig04598</b>  | gi 228473605 Capnocytophaga gingivalis         | 30.57      | 193              | 555      | 40     | 35       | 220    | 5.00E-12 | 77        |
| <b>contig10181</b>  | gi 120436187 Gramella forsetii KT0803          | 44.17      | 120              | 2        | 361    | 2209     | 2328   | 7.00E-22 | 106       |
| <b>contig11249</b>  | gi 90022645 Saccharophagus degradans 2 40      | 50         | 34               | 5        | 106    | 706      | 739    | 0.014    | 42.7      |
| <b>contig07930</b>  | gi 198274843 Bacteroides plebeius              | 75         | 120              | 2        | 361    | 41       | 158    | 6.00E-51 | 203       |
| <b>contig20761</b>  | gi 254784408 Teredinibacter turnerae T7901     | 63.33      | 30               | 52       | 141    | 297      | 326    | 0.002    | 45.8      |
| <b>contig25459</b>  | gi 189347360 Chlorobium limicola DSM 245       | 46.99      | 83               | 1        | 228    | 1854     | 1936   | 4.00E-11 | 71.2      |
| <b>contig20414</b>  | gi 156740923 Roseiflexus castenholzii DSM      | 65.57      | 61               | 1        | 183    | 708      | 768    | 1.00E-08 | 63.2      |
| <b>contig15701</b>  | gi 90021040 Saccharophagus degradans 2 40      | 51.72      | 58               | 212      | 54     | 678      | 735    | 2.00E-08 | 62        |
| <b>contig25008</b>  | gi 153872900 cyclase Beggiatoa sp              | 44.16      | 77               | 230      | 3      | 152      | 221    | 9.00E-07 | 56.6      |
| <b>contig00570</b>  | gi 146301709 Flavobacterium johnsoniae         | 38.67      | 75               | 318      | 94     | 3526     | 3587   | 2.00E-06 | 55.5      |
| <b>contig15304</b>  | gi 260454326 Streptomyces flavogriseus         | 67.86      | 28               | 2        | 85     | 277      | 304    | 0.005    | 44.3      |
| <b>contig21246</b>  | gi 71736991 putative Pseudomonas syringae      | 46.75      | 77               | 233      | 3      | 4944     | 5002   | 2.00E-10 | 68.6      |
| <b>contig23584</b>  | gi 269124685 Thermomonospora curvata           | 63.41      | 41               | 124      | 2      | 412      | 452    | 3.00E-06 | 54.7      |
| <b>contig00357</b>  | gi 182681111 Xylella fastidiosa                | 55.56      | 27               | 19       | 99     | 188      | 214    | 0.029    | 41.6      |
| <b>contig08179</b>  | gi 83646812 Hahella chejuensis                 | 62.5       | 32               | 179      | 274    | 390      | 421    | 8.00E-11 | 49.3      |
| <b>contig15332</b>  | gi 146301068 Flavobacterium johnsoniae         | 50         | 54               | 196      | 35     | 749      | 802    | 8.00E-05 | 50.1      |
| <b>contig16110</b>  | gi 255258429 Sideroxydans lithotrophicus ES.1  | 69.23      | 39               | 173      | 57     | 734      | 772    | 1.00E-08 | 62.8      |
| <b>contig16669</b>  | gi 90021040 like Saccharophagus degradans 2 40 | 69.23      | 26               | 27       | 104    | 1274     | 1299   | 0.04     | 41.2      |
| <b>contig17172</b>  | gi 90023532 Saccharophagus degradans 2 40      | 44.26      | 61               | 185      | 3      | 90       | 150    | 3.00E-04 | 48.1      |
| <b>contig06033</b>  | gi 110637740 Cytophaga hutchinsonii            | 37.65      | 170              | 521      | 12     | 468      | 631    | 1.00E-24 | 116       |
| <b>contig04332</b>  | gi 159897943 Herpetosiphon aurantiacus         | 51.52      | 33               | 103      | 5      | 226      | 258    | 0.067    | 40.4      |
| <b>contig01518</b>  | gi 71282619 Colwellia psychrerythraea 34H      | 64.1       | 78               | 2        | 235    | 508      | 585    | 2.00E-19 | 98.6      |

Supplementary Table 2. *Cont.*

| Assembled contig ID | NCBI Accession number and Organism         | % identity | alignment length | q. start | q. end | s. start | s. end | e-value  | bit score |
|---------------------|--------------------------------------------|------------|------------------|----------|--------|----------|--------|----------|-----------|
| <b>contig11361</b>  | gi 253573954 Paenibacillus sp              | 40.63      | 64               | 198      | 7      | 208      | 268    | 6.00E-05 | 50.4      |
| <b>contig25454</b>  | gi 254786337 Teredinibacter turnerae T7901 | 28.88      | 187              | 1        | 549    | 239      | 383    | 4.00E-11 | 71.6      |
| <b>contig15581</b>  | gi 186686820 Nostoc punctiforme            | 70         | 40               | 3        | 122    | 958      | 997    | 8.00E-08 | 60.1      |
| <b>contig02861</b>  | gi 110639943 Cytophaga hutchinsonii        | 76.67      | 30               | 282      | 193    | 350      | 379    | 8.00E-11 | 46.2      |

**Supplementary Table 3.** Summary of multiple assembled contigs providing similarities with the same protein in the constructed Glycoside Hydrolase database.

| <b>454 Sequencing contig</b>                                                                                                                                                                    | <b>UniProt Accession number</b> | <b>Organism known to encode the protein</b>             | <b>UniProt description</b>            |
|-------------------------------------------------------------------------------------------------------------------------------------------------------------------------------------------------|---------------------------------|---------------------------------------------------------|---------------------------------------|
| contig03455<br>contig04013<br>contig08782<br>contig15223<br>contig06190<br>contig23338<br>contig01813<br>contig14858<br>contig01054<br>contig12768<br>contig25208<br>contig04598<br>contig00570 | Q11PI8_CYTH3                    | Cytophaga hutchinsonii (strain ATCC 33406 / NCIMB 9469) | Beta-glycosidase related protein GH8  |
| contig12578<br>contig05391                                                                                                                                                                      | A7V9B3_BACUN                    | Bacteroides uniformis ATCC 8492                         | Uncharacterised protein GH9           |
| contig14077<br>contig10093                                                                                                                                                                      | B3PEQ9_CELJU                    | Cellvibrio japonicus (strain Ueda107)                   | Endo-1,4-beta-D-glucanase (Cel9B) GH9 |
| contig01403<br>contig07930                                                                                                                                                                      | B5JIL5_9BACT                    | Verrucomicrobiae bacterium DG1235                       | Cellulase GH5                         |
| contig09617<br>contig13222                                                                                                                                                                      | B7AFY4_9BACE                    | Bacteroides eggerthii DSM 20697                         | Uncharacterised protein of GH8        |
| contig13913<br>contig05967                                                                                                                                                                      | C0INS7_9BACT                    | uncultured bacterium BLR10                              | Cellulase GH 9                        |

**Supplementary Table 3. Cont.**

---

| <b>454 Sequencing contig</b>       | <b>UniProt Accession number</b> | <b>Organism known to encode the protein</b>                     | <b>UniProt description</b>                 |
|------------------------------------|---------------------------------|-----------------------------------------------------------------|--------------------------------------------|
| <b>contig14342<br/>contig11080</b> | C1S930_9SPHI                    | Chitinophaga pinensis DSM 2588                                  | Chitinase GH18                             |
| <b>contig07270<br/>contig08179</b> | C1UVR8_9DELT                    | Haliangium ochraceum DSM 14365                                  | Cellulase                                  |
| <b>contig01065<br/>contig00162</b> | Q11SW6_CYTH3                    | Cytophaga hutchinsonii (strain ATCC 33406 / NCIMB 9469)         | Endoglucanase related protein GH9          |
| <b>contig02397<br/>contig02925</b> | Q11UC0_CYTH3                    | Cytophaga hutchinsonii (strain ATCC 33406 / NCIMB 9469)         | Endoglucanase related protein GH 5         |
| <b>contig08470<br/>contig17865</b> | Q11VF9_CYTH3                    | Cytophaga hutchinsonii (strain ATCC 33406 / NCIMB 9469)         | Endoglucanase related protein GH 9         |
| <b>contig11249<br/>contig11361</b> | Q21GB9_SACD2                    | Saccharophagus degradans (strain 2-40 / ATCC 43961 / DSM 17024) | Endoglucanase GH5                          |
| <b>contig01678<br/>contig07103</b> | Q21HS9_SACD2                    | Saccharophagus degradans (strain 2-40 / ATCC 43961 / DSM 17024) | Endoglucanase like protein GH5             |
| <b>contig05603<br/>contig04413</b> | Q21NA7_SACD2                    | Saccharophagus degradans (strain 2-40 / ATCC 43961 / DSM 17024) | b-glycosidase GH 9                         |
| <b>contig23584<br/>contig15581</b> | Q245S3_TETTH                    | Tetrahymena thermophila SB210                                   | Cellulase GH5                              |
| <b>contig05463<br/>contig15332</b> | Q2SCY8_HAHCH                    | Hahella chejuensis (strain KCTC 2396)                           | Beta-glucanase/Beta-glucan synthetase GH16 |

---

**Supplementary Table 3. Cont.**

---

| <b>454 Sequencing contig</b>                                       | <b>UniProt Accession number</b> | <b>Organism known to encode the protein</b>                         | <b>UniProt description</b>                 |
|--------------------------------------------------------------------|---------------------------------|---------------------------------------------------------------------|--------------------------------------------|
| <b>contig02705<br/>contig12854</b>                                 | Q2SHX0_HAHCH                    | Hahella chejuensis (strain KCTC 2396)                               | Beta-glucanase/Beta-glucan synthetase GH16 |
| <b>contig02917<br/>contig04098</b>                                 | Q308B9_9BACT                    | Uncultured bacterium                                                | Endo-1,4-beta-D-glucanase GH9              |
| <b>contig11483<br/>contig00357</b>                                 | Q3R055_XYLFA                    | Xylella fastidiosa Ann-1                                            | Cellulase GH6                              |
| <b>contig04503<br/>contig14537</b>                                 | Q9X3P6_9FIRM                    | Caldicellulosiruptor sp. Tok7B.1                                    | CelB GH5                                   |
| <b>contig17293<br/>contig09391<br/>contig22348<br/>contig03216</b> | B7RVI9_9GAMM                    | marine gamma proteobacterium HTCC2148                               | Uncharacterised protein GH16               |
| <b>contig04687<br/>contig22358<br/>contig16794</b>                 | C5BPZ6_9GAMM                    | Teredinibacter turnerae T7901                                       | GH16 protein                               |
| <b>contig06707<br/>contig05872<br/>contig10691</b>                 | Q11UJ1_CYTH3                    | Cytophaga hutchinsonii (strain ATCC 33406 / NCIMB 9469)             | Endoglucanase GH9                          |
| <b>contig02702<br/>contig20063<br/>contig15246</b>                 | Q12KZ3_SHEDO                    | Shewanella denitrificans (strain OS217 / ATCC BAA-1090 / DSM 15013) | GH16                                       |

---

**Supplementary Table 3. Cont.**

---

| <b>454 Sequencing contig</b>                                                                                       | <b>UniProt Accession number</b> | <b>Organism known to encode the protein</b>                     | <b>UniProt description</b>           |
|--------------------------------------------------------------------------------------------------------------------|---------------------------------|-----------------------------------------------------------------|--------------------------------------|
| <b>contig15633<br/>contig18210<br/>contig04801</b>                                                                 | Q21F54_SACD2                    | Saccharophagus degradans (strain 2-40 / ATCC 43961 / DSM 17024) | Putative retaining b-glycosidase GH5 |
| <b>contig23140<br/>contig15044<br/>contig11559</b>                                                                 | Q2SFD8_HAHCH                    | Hahella chejuensis (strain KCTC 2396)                           | Endoglucanase GH5                    |
| <b>contig19349<br/>contig10599<br/>contig00744<br/>contig03003</b>                                                 | A0Y0X8_9GAMM                    | Alteromonadales bacterium TW-7                                  | GH16                                 |
| <b>contig18893<br/>contig16578<br/>contig09275<br/>contig25883</b>                                                 | Q47XT7_COLP3                    | Colwellia psychrerythraea (strain 34H / ATCC BAA-681)           | GH16                                 |
| <b>contig06721<br/>contig04690<br/>contig07415<br/>contig09168<br/>contig01223</b>                                 | Q11NQ3_CYTH3                    | Cytophaga hutchinsonii (strain ATCC 33406 / NCIMB 9469)         | GH8                                  |
| <b>contig26022<br/>contig25780<br/>contig00382<br/>contig17731<br/>contig20414<br/>contig01518<br/>contig02861</b> | A7LS44_BACOV                    | Bacteroides ovatus ATCC 8483                                    | GH16                                 |

---

**Supplementary Table 3. Cont.**

| <b>454 Sequencing contig</b>                                                                                                        | <b>UniProt Accession number</b> | <b>Organism known to encode the protein</b>                     | <b>UniProt description</b>           |
|-------------------------------------------------------------------------------------------------------------------------------------|---------------------------------|-----------------------------------------------------------------|--------------------------------------|
| contig05277<br>contig26107<br>contig25564<br>contig04461<br>contig04615<br>contig23608<br>contig07156<br>contig20679<br>contig06547 | Q11VQ4_CYTH3                    | Cytophaga hutchinsonii (strain ATCC 33406 / NCIMB 9469)         | GH8                                  |
| contig00226<br>contig26301<br>contig06009<br>contig04779<br>contig03397<br>contig08385<br>contig25770<br>contig26116                | Q11PI9_CYTH3                    | Cytophaga hutchinsonii (strain ATCC 33406 / NCIMB 9469)         | Beta-glycosidase related protein GH8 |
| contig16934<br>contig00765<br>contig01984<br>contig24905<br>contig01703<br>contig25649<br>contig15196<br>contig15701<br>contig16669 | Q21KX4_SACD2                    | Saccharophagus degradans (strain 2-40 / ATCC 43961 / DSM 17024) | Retaining $\beta$ -glycosidase GH16  |
